# Supplementary material
Source: MDPI journal article supplement (https://www.mdpi.com/2624-5175/4/4/46)
Supplement: s1 [file s1]

**Table S1.** Prevalence of NRS among non-SSD individuals by demographic characteristics

|             |                                 | Men (N= 23,459) |             |         | Women (N=24,506) |             |         |
|-------------|---------------------------------|-----------------|-------------|---------|------------------|-------------|---------|
|             |                                 | %               | 95%CI       | p-value | %                | 95%CI       | p-value |
| Total       |                                 | 10.9            | 10.5 - 11.3 |         | 10.3             | 9.9 - 10.6  |         |
| Age class   |                                 |                 |             |         |                  |             |         |
|             | 20-29                           | 12.4            | 11.1 - 13.7 | <0.001  | 11.9             | 10.7 - 13.2 | <0.001  |
|             | 30-39                           | 16.6            | 15.4 - 17.9 |         | 14.3             | 13.2 - 15.4 |         |
|             | 40-49                           | 15.2            | 14.0 - 16.4 |         | 15.3             | 14.1 - 16.5 |         |
|             | 50-59                           | 13.1            | 12.0 - 14.3 |         | 12.6             | 11.5 - 13.8 |         |
|             | 60-69                           | 7.5             | 6.8 - 8.3   |         | 6.7              | 6.0 - 7.4   |         |
|             | 70-79                           | 5.5             | 4.8 - 6.3   |         | 5.6              | 4.9 - 6.4   |         |
|             | 80+                             | 5.7             | 4.7 - 7.0   |         | 6.7              | 5.8 - 7.7   |         |
| Alcohol/day |                                 |                 |             |         |                  |             |         |
|             | None                            | 11.2            | 10.6 - 11.9 | <0.001  | 9.8              | 9.4 - 10.3  | <0.001  |
|             | ≥0, <23g                        | 9.9             | 9.2 - 10.6  |         | 10.6             | 9.7 - 11.5  |         |
|             | ≥23, <46g                       | 10.4            | 9.5 - 11.3  |         | 12.8             | 10.9 - 14.9 |         |
|             | ≥46, <69g (men)    ≥46g (women) | 11.4            | 10.0 - 12.9 |         | 16.3             | 13.3 - 19.7 |         |
|             | ≥69g (men)                      | 16.7            | 14.5 - 19.1 |         | -                | - - -       |         |
| Smoking     |                                 |                 |             |         |                  |             |         |
|             | Nonsmoker                       | 9.9             | 9.5 - 10.4  | <0.001  | 9.9              | 9.5 - 10.3  | <0.001  |
|             | Light smoker                    | 12.5            | 11.7 - 13.4 |         | 14.6             | 13.1 - 16.2 |         |
|             | Heavy smoker                    | 15.2            | 13.4 - 17.2 |         | 12.9             | 8.6 - 18.4  |         |

Mental distress

|          |      |             |        |      |             |        |
|----------|------|-------------|--------|------|-------------|--------|
| Light    | 7.1  | 6.7 - 7.5   | <0.001 | 6.3  | 5.9 - 6.6   | <0.001 |
| Moderate | 20.8 | 19.6 - 22.0 |        | 19.4 | 18.4 - 20.5 |        |
| Serious  | 41.7 | 37.8 - 45.7 |        | 32.9 | 29.7 - 36.3 |        |

Participants for whom data were missing were excluded from the analyses.

Abbreviations: NRS: nonrestorative sleep, SSD: short sleep duration (< 6h), CI: confidential interval

p-value was calculated by  $\chi^2$  test.

**Table S2.** Odds ratio of NRS for alcohol and smoking among men with non-SSD

|                                      | Model 1 (N=23,077) |             |         |  | Model 2 (N=22,265) |             |         |  | Model 3 (N=19,950) |             |         |  |
|--------------------------------------|--------------------|-------------|---------|--|--------------------|-------------|---------|--|--------------------|-------------|---------|--|
|                                      | OR                 | 95%CI       | p-value |  | OR                 | 95%CI       | p-value |  | OR                 | 95%CI       | p-value |  |
| Alcohol /day (ref non-alcohol drink) |                    |             |         |  |                    |             |         |  |                    |             |         |  |
| ≥0, <23g                             | 0.91               | 0.80 - 1.03 | 0.128   |  | 0.96               | 0.84 - 1.10 | 0.579   |  | 0.93               | 0.80 - 1.07 | 0.292   |  |
| ≥23, <46g                            | 0.96               | 0.82 - 1.12 | 0.611   |  | 1.05               | 0.89 - 1.23 | 0.594   |  | 0.97               | 0.82 - 1.16 | 0.767   |  |
| ≥46, <69g                            | 1.18               | 0.95 - 1.46 | 0.142   |  | 1.22               | 0.96 - 1.54 | 0.098   |  | 1.09               | 0.85 - 1.40 | 0.485   |  |
| ≥69g                                 | 1.61               | 1.24 - 2.09 | <0.001  |  | 1.51               | 1.14 - 2.01 | 0.004   |  | 1.39               | 1.03 - 1.86 | 0.031   |  |
| Smoking (ref non-smoker)             |                    |             |         |  |                    |             |         |  |                    |             |         |  |
| Light smoker                         | 1.18               | 1.01 - 1.37 | 0.034   |  | 1.17               | 0.99 - 1.37 | 0.059   |  | 1.24               | 1.05 - 1.47 | 0.011   |  |
| Heavy smoker                         | 1.71               | 1.31 - 2.23 | <0.001  |  | 1.43               | 1.08 - 1.89 | 0.013   |  | 1.52               | 1.13 - 2.05 | 0.006   |  |

Abbreviations: NRS: nonrestorative sleep, SSD: short sleep duration (< 6h), CI: confidential interval

Participants for whom data were missing were excluded from the analyses.

Model 1: Adjusted age group and interaction between alcohol and smoking.

Model 2: Model 1+ diet, exercise, sleep duration, and mental distress.

Model 3: Model 2+ marital status and education class.

p-value was calculated by the multiple logistic regression.

**Table S3.** Odds ratio of NRS for alcohol and smoking among women with non-SSD

|                                     | Model 1 (N=24,147) |       |        |         | Model 2 (N=23,184) |       |        |         | Model 3 (N=20,757) |       |        |         |
|-------------------------------------|--------------------|-------|--------|---------|--------------------|-------|--------|---------|--------------------|-------|--------|---------|
|                                     | OR                 | 95%CI |        | p-value | OR                 | 95%CI |        | p-value | OR                 | 95%CI |        | p-value |
| Alcohol/day (ref non-alcohol drink) |                    |       |        |         |                    |       |        |         |                    |       |        |         |
| ≥0, <23g                            | 0.94               | 0.84  | - 1.05 | 0.252   | 0.88               | 0.78  | - 0.99 | 0.033   | 0.90               | 0.79  | - 1.01 | 0.083   |
| ≥23, <46g                           | 1.28               | 1.04  | - 1.58 | 0.020   | 1.26               | 1.00  | - 1.57 | 0.047   | 1.25               | 0.99  | - 1.57 | 0.062   |
| ≥46g                                | 1.57               | 1.15  | - 2.12 | 0.004   | 1.48               | 1.06  | - 2.06 | 0.021   | 1.31               | 0.92  | - 1.87 | 0.132   |
| Smoking (ref non-smoker)            |                    |       |        |         |                    |       |        |         |                    |       |        |         |
| Light smoker                        | 1.33               | 1.11  | - 1.59 | 0.002   | 1.07               | 0.88  | - 1.30 | 0.476   | 1.10               | 0.89  | - 1.35 | 0.375   |
| Heavy smoker                        | 1.22               | 0.66  | - 2.24 | 0.530   | 0.75               | 0.39  | - 1.46 | 0.402   | 0.84               | 0.41  | - 1.69 | 0.616   |

Abbreviations: NRS: nonrestorative sleep, SSD: short sleep duration (< 6h), CI: confidential interval

Participants for whom data were missing were excluded from the analyses.

Model 1: Adjusted age group and interaction between alcohol and smoking.

Model 2: Model 1+ diet, exercise, sleep duration, and mental distress.

Model 3: Model 2+ marital status and education class.

p-value was calculated by the multiple logistic regression.
